# Supplementary material for: Isogenic human trophectoderm cells demonstrate the role of NDUFA4 and associated variants in ZIKV infection
Source: PubMed Central journal article supplement (PMC10391681; doi:10.1016/j.isci.2023.107001), 2023-05-29
Supplement: mmc1.pdf [file mmc1.pdf]

## Supplemental information

### Isogenic human trophectoderm cells demonstrate the role of *NDUFA4* and associated variants in ZIKV infection

Liuliu Yang, Yuling Han, Ting Zhou, Laretta A. Lacko, Mohsan Saeed, Christina Tan, Ron Danziger, Jiajun Zhu, Zeping Zhao, Clare Cahir, Alice Maria Giani, Yang Li, Xue Dong, Dorota Moroziewicz, The NYSCF Global Stem Cell Array® Team, Daniel Paull, Zhengming Chen, Aaron Zhong, Scott A. Noggle, Charles M. Rice, Qibin Qi, Todd Evans, and Shuibing Chen

Figure S1

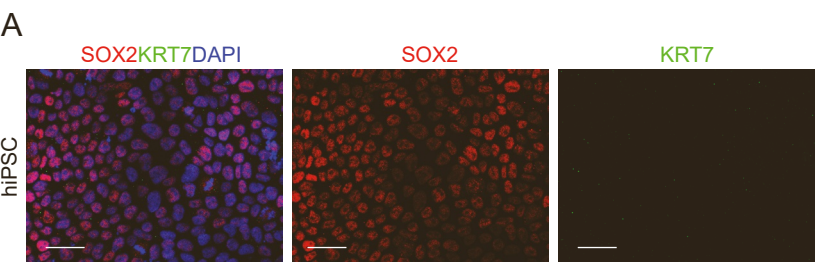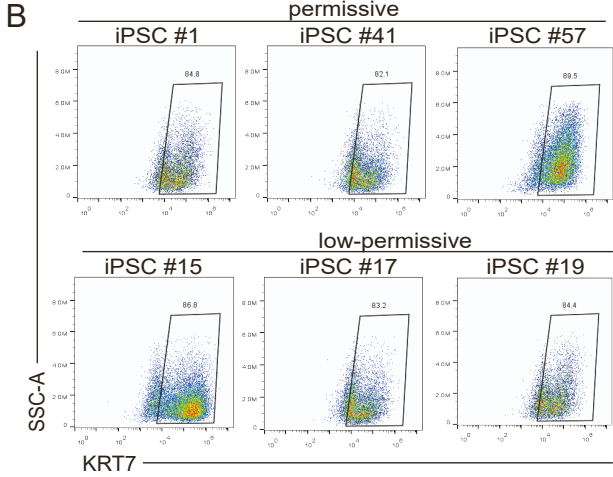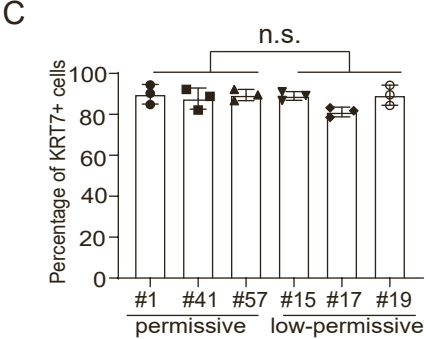

## SUPPLEMENTAL FIGURES

**Figure S1, related to Figure 1. Different background hiPSCs are equally efficient at generating trophectoderm cells.**

**(A)** Representative confocal images of SOX2 and KRT7 staining in hiPSCs. Scale bar=50  $\mu$ m.

**(B and C)** Flow cytometry analysis (B) and quantification (C) of KRT7 staining in trophectoderm cells derived from permissive cell lines: iPSC #1, iPSC #41 and iPSC #57 or low permissive cell lines: iPSC #15, iPSC #17 and iPSC #19.

Data are representative of at least three independent experiments. For *P* values, we averaged the 3 technical replicates within each cell line, then used the averages for an unpaired two-tailed *Student's t*-test. n.s. no significance.

Figure S2

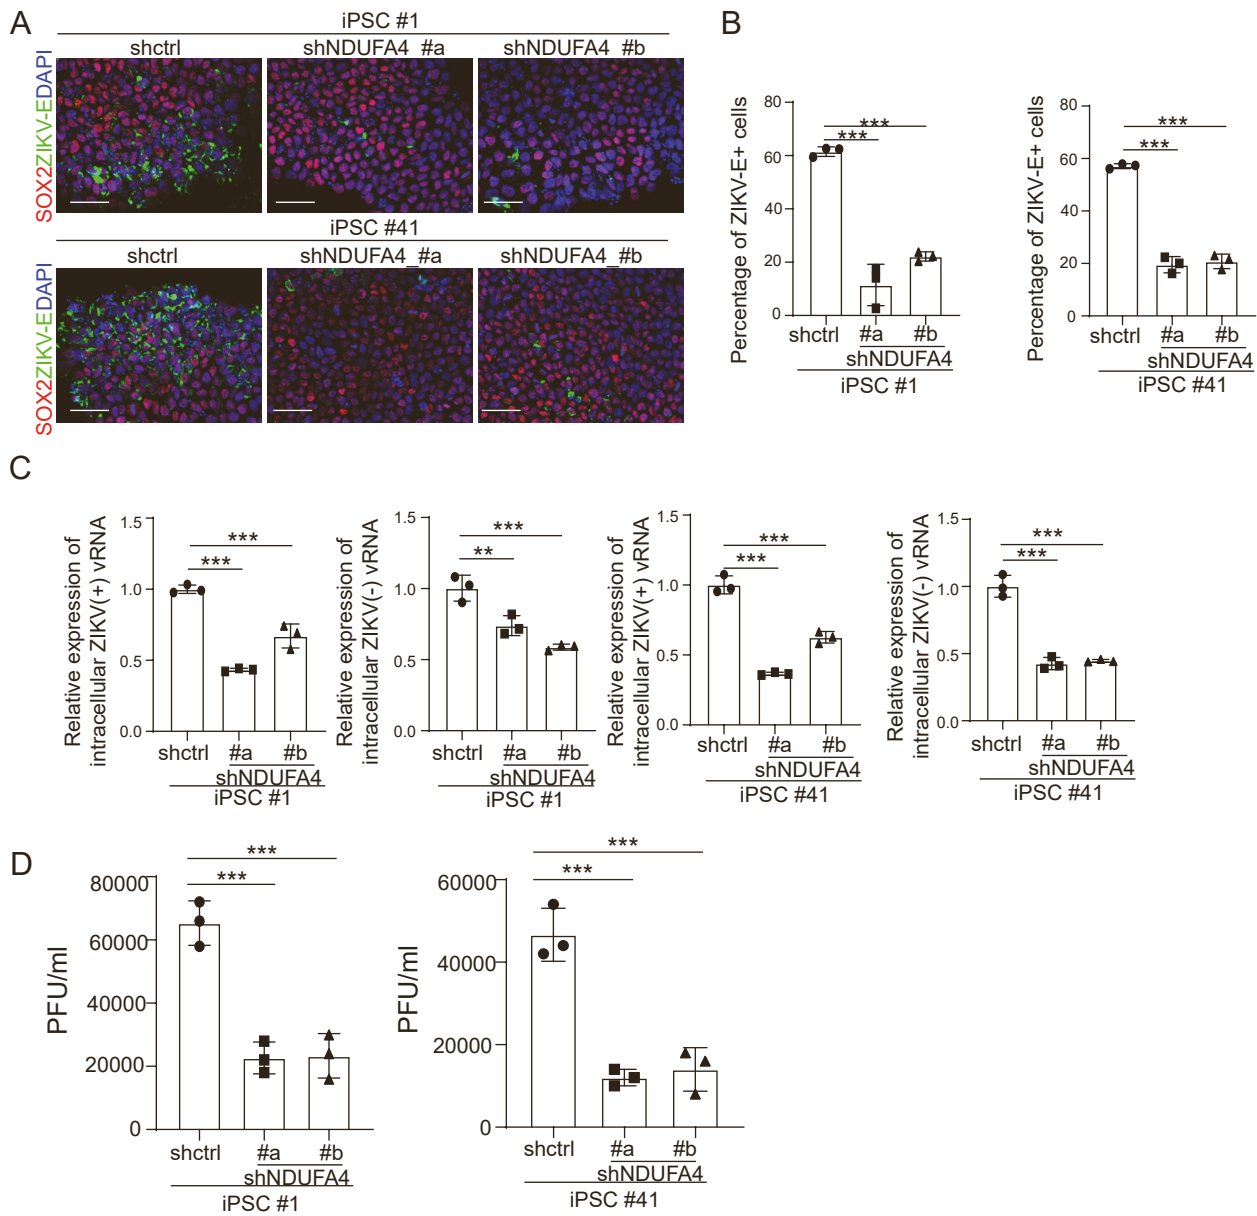

**Figure S2, related to Figure 2. Knockdown of *NDUFA4* decreases ZIKV permissiveness to infection.**

**(A and B)** Representative confocal images (A) and the quantification (B) of ZIKV-E and SOX2 staining in NDUFA4 knockdown lines of iPSC #1 (shctrl, shNDUFA4 #a, shNDUFA4 #b) and iPSC #41 (shctrl, shNDUFA4 #a, shNDUFA4 #b) at 72 hpi (ZIKV<sup>U</sup>, MOI=0.15). Scale bar=50  $\mu$ m.

**(C)** qRT-PCR analysis of (+) or (-) ZIKV vRNA strands in NDUFA4 knockdown lines of iPSC #1 (shctrl, shNDUFA4 #a, shNDUFA4 #b) and iPSC #41 (shctrl, shNDUFA4 #a, shNDUFA4 #b) at 72 hpi (ZIKV<sup>U</sup>, MOI=0.15).

**(D)** Viral titers of ZIKV virus in the supernatant of NDUFA4 knockdown cell lines of iPSC #1 (shctrl, shNDUFA4 #a, shNDUFA4 #b) or iPSC #41 (shctrl, shNDUFA4 #a, shNDUFA4 #b) at 72 hpi (ZIKV<sup>U</sup>, MOI=0.15) quantified by plaque assay.

Data are representative of at least three independent experiments. *P* values were calculated by one-way ANOVA followed by a *Dunnett's* post hoc test with a common control for multiple testing correction. \*\**P* < 0.01, \*\*\**P* < 0.001.

Figure S3

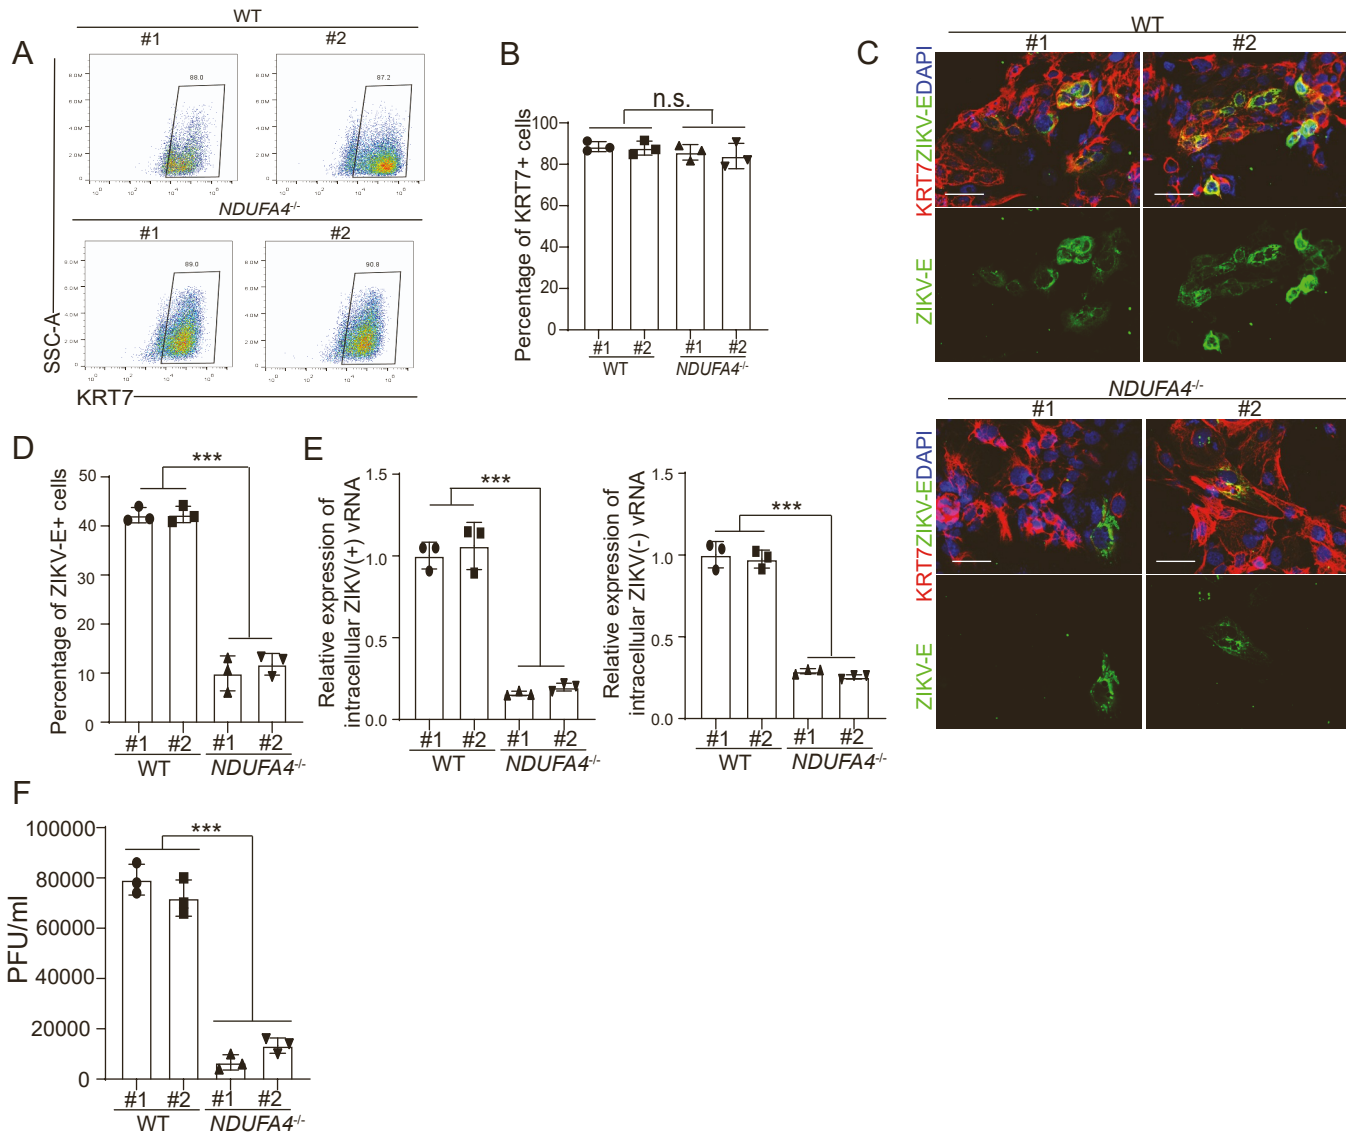

**Figure S3, related to Figure 3. The expression of NDUFA4 is associated with ZIKV infection in trophectoderm cells.**

**(A and B)** Flow cytometry analysis (A) and the quantification (B) of KRT7<sup>+</sup> cells in trophectoderm cells derived from WT or *NDUFA4*<sup>-/-</sup> hiPSCs.

**(C and D)** Representative images (C) and the quantification (D) of ZIKV-E staining in KRT7<sup>+</sup> trophectoderm cells derived from WT or *NDUFA4*<sup>-/-</sup> hiPSCs at 72 hpi (ZIKV<sup>U</sup>, MOI=0.15). Scale bar=50  $\mu$ m.

**(E)** qRT-PCR analysis of (+) and (-) ZIKV vRNA strands in trophectoderm cells derived from WT or *NDUFA4*<sup>-/-</sup> hiPSCs at 72 hpi (ZIKV<sup>U</sup>, MOI=0.15).

**(F)** Viral titers of ZIKV virus in the supernatant of trophectoderm cells derived from WT or *NDUFA4*<sup>-/-</sup> hiPSCs at 72 hpi (ZIKV<sup>U</sup>, MOI=0.15) quantified by plaque assay.

Data are representative of at least three independent experiments. *P* values were calculated by two-way ANOVA analysis; n.s. no significance, \*\*\**P* < 0.001.

Figure S4

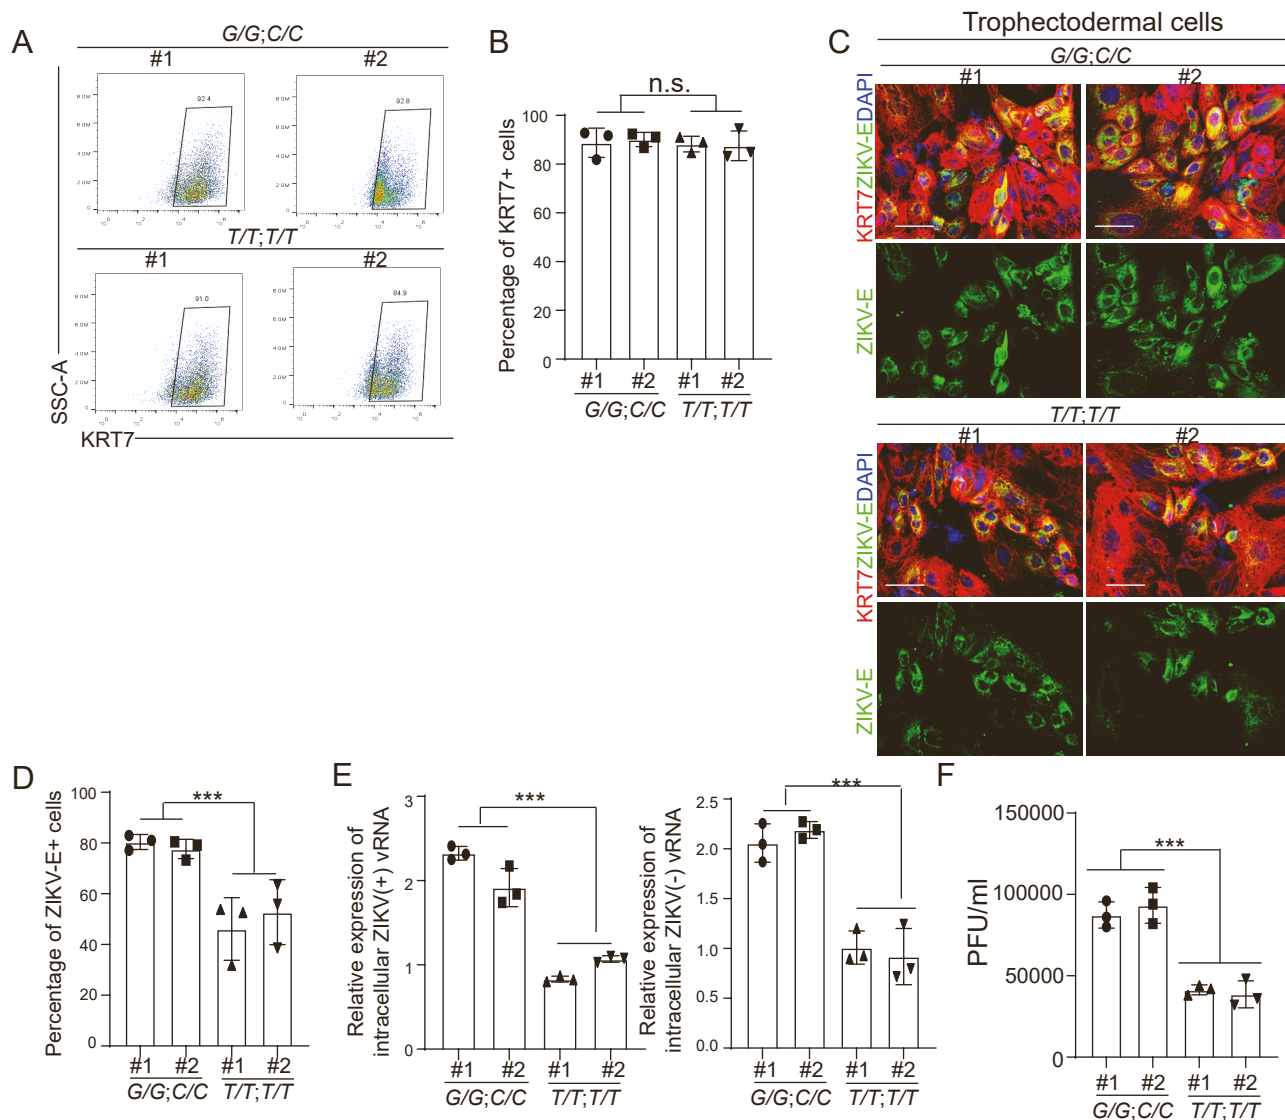



**Figure S4, related to Figure 4. SNPs for risk alleles of *NDUFA4* promote the infection of ZIKV virus in trophectoderm cells.**

**(A and B)** Flow cytometry analysis (A) and the quantification (B) of KRT7<sup>+</sup> cells in trophectoderm cells differentiated from hiPSC lines carrying risk (*G/G*; *C/C*) or non-risk (*T/T*; *T/T*) alleles.

**(C and D)** Representative images (C) and the quantification (D) of ZIKV-E staining in KRT7<sup>+</sup> trophectoderm cells derived from hiPSC lines carrying risk (*G/G*; *C/C*) or non-risk (*T/T*; *T/T*) alleles at 72 hpi (ZIKV<sup>U</sup>, MOI=0.15). Scale bar=50  $\mu$ m.

**(E)** qRT-PCR analysis of (+) and (-) ZIKV vRNA strands in trophectoderm cells derived from hiPSC lines carrying risk (*G/G*; *C/C*) or non-risk (*T/T*; *T/T*) alleles at 72 hpi (ZIKV<sup>U</sup>, MOI=0.15).

**(F)** Viral titers of ZIKV virus in the supernatant of trophectoderm cells derived from hiPSCs carrying risk (*G/G*; *C/C*) or non-risk (*T/T*; *T/T*) alleles at 72 hpi (ZIKV<sup>U</sup>, MOI=0.15) quantified by plaque assay.

Data are representative of at least three independent experiments. *P* values were calculated by two-way ANOVA analysis; n.s. no significance, \*\*\**P* < 0.001.

Figure S5

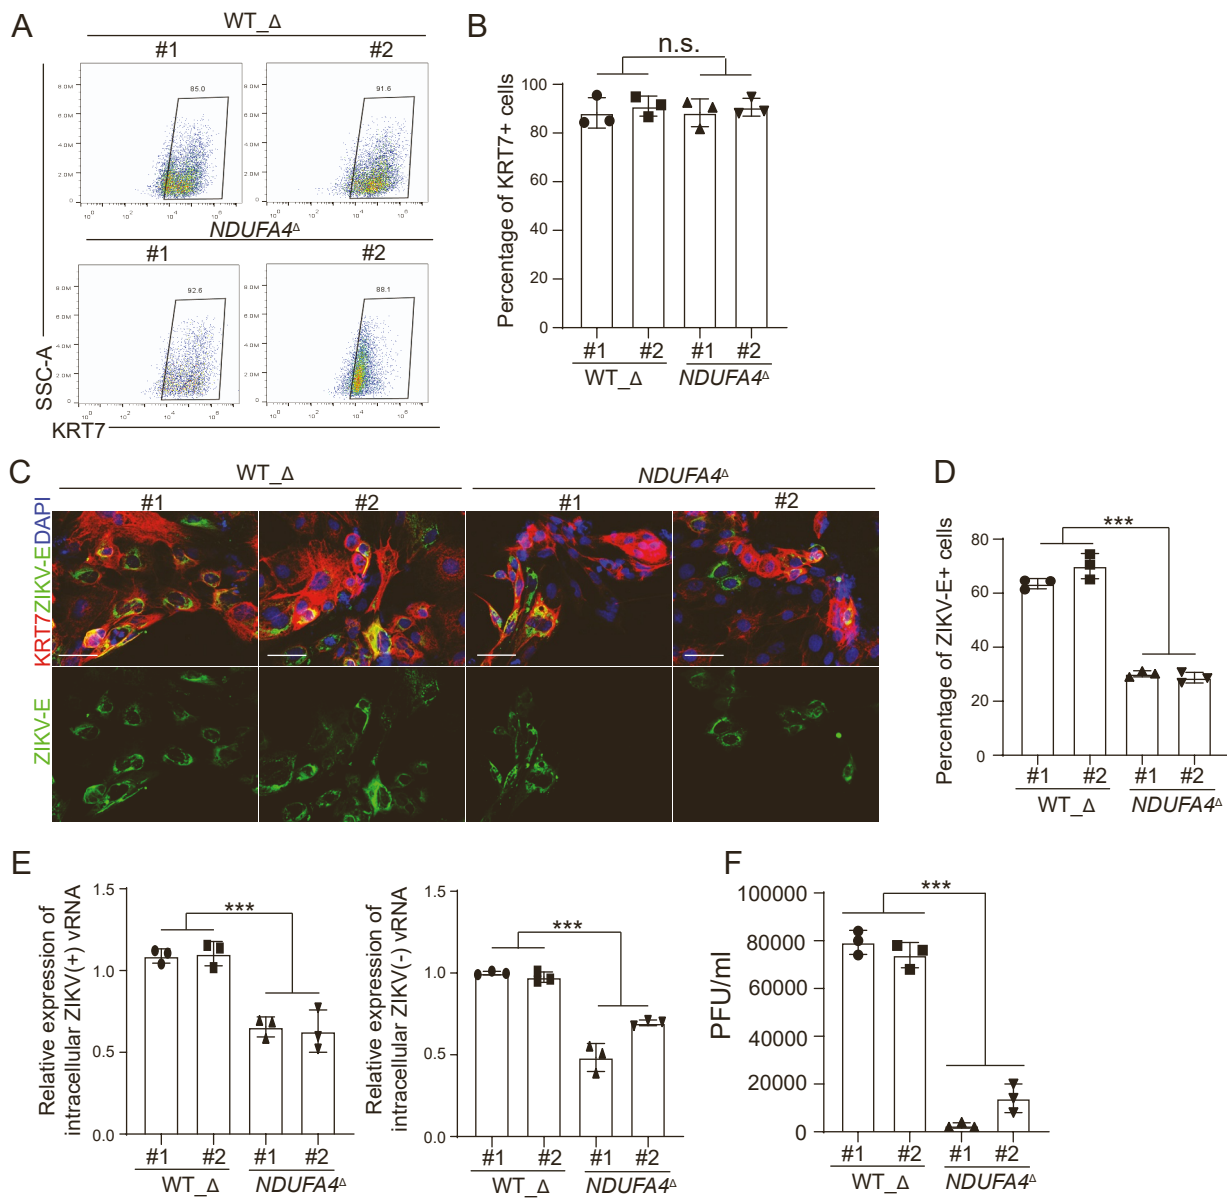

**Figure S5, related to Figure 5. Deletion of the *cis*-regulatory region decreases the sensitivity of ZIKV infection in trophectoderm cells.**

**(A and B)** Flow cytometry analysis (A) and the quantification (B) of KRT7<sup>+</sup> cells in trophectoderm cells derived from WT\_Δ or *NDUFA4*<sup>Δ</sup> hiPSCs.

**(C and D)** Representative images (C) and the quantification (D) of ZIKV-E staining in KRT7<sup>+</sup> trophectoderm cells derived from WT\_Δ or *NDUFA4*<sup>Δ</sup> hiPSCs at 72 hpi (ZIKV<sup>U</sup>, MOI=0.15). Scale bar=50 μm.

**(E)** qRT-PCR analysis of (+) or (-) ZIKV vRNA strands of trophectoderm cells derived from WT\_Δ or *NDUFA4*<sup>Δ</sup> hiPSCs at 72 hpi (ZIKV<sup>U</sup>, MOI=0.15).

**(F)** Viral titers of ZIKV virus in the supernatant of trophectoderm cells derived from WT\_Δ or *NDUFA4*<sup>Δ</sup> hiPSCs at 72 hpi (ZIKV<sup>U</sup>, MOI=0.15) quantified by plaque assay.

Data are representative of at least three independent experiments. *P* values were calculated by two-way ANOVA analysis; n.s. no significance and \*\*\**P* < 0.001.

Figure S6

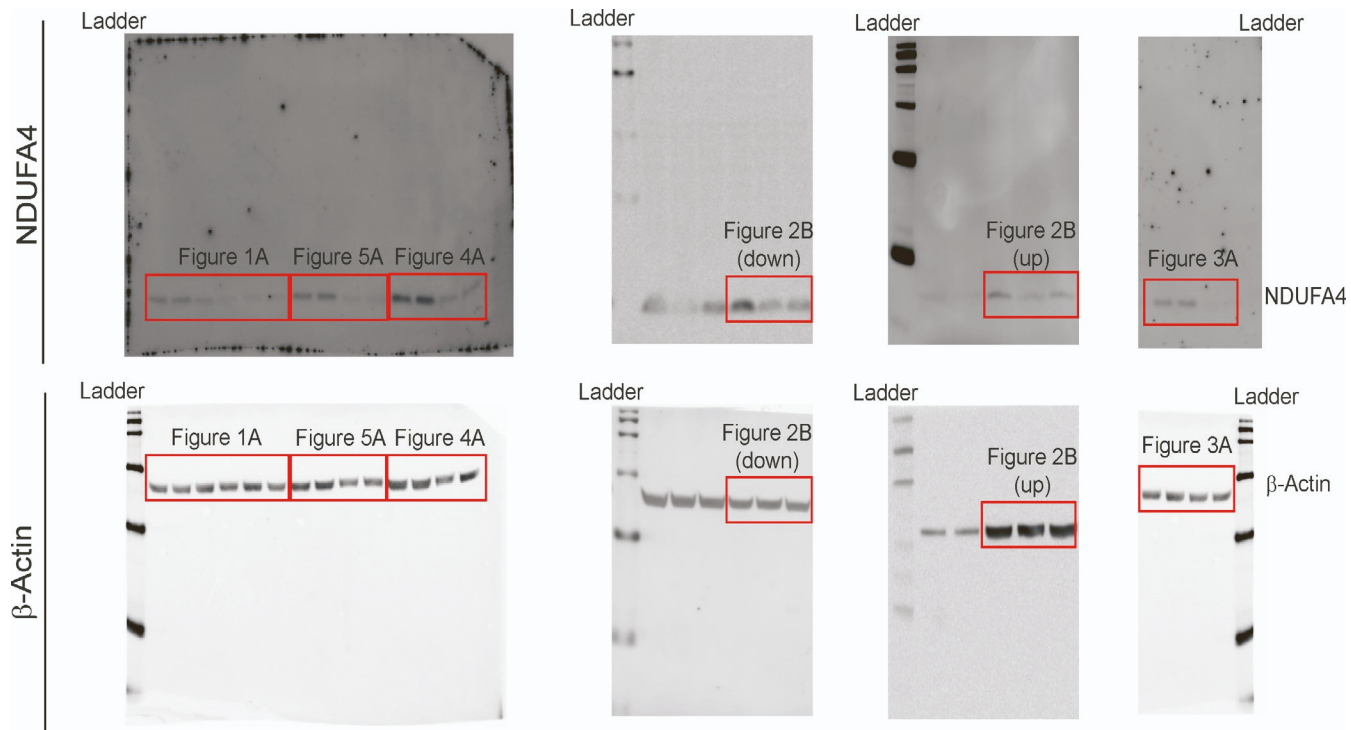

**Figure S6, related to figure1-5. Raw data of western blotting.**

**Table S1. Primers/probes used for Sanger sequencing, PCR and qRT-PCR, Related to STAR Methods.**

| <b>Primer Name</b>               | <b>Sequence</b>                                                              |
|----------------------------------|------------------------------------------------------------------------------|
| ZIKV (+) vRNA-RT                 | <i>TACTTGTACAGCTCGTCCATGCCACTAACGTTCT<br/>TTTGCAGACAT</i>                    |
| ZIKV (+) vRNA-PCR forward        | <i>CCGCTGCCCAACACAAG</i>                                                     |
| ZIKV (+) vRNA-PCR reverse        | <i>TACTTGTACAGCTCGTCCATG</i>                                                 |
| ZIKV (+) vRNA-PCR probe          | <i>5’-/56-<br/>FAM/AGCCTACCT/ZEN/TGACAAGCAATCAGACA<br/>CTCAA/3IABkFQ/-3’</i> |
| ZIKV (-) vRNA-RT                 | <i>AACAGCCACAACGTCTATATCCCGCTGCCCAAC<br/>ACAAG</i>                           |
| ZIKV (-) vRNA-PCR forward        | <i>AACAGCCACAACGTCTATATC</i>                                                 |
| ZIKV (-) vRNA-PCR reverse        | <i>CCACTAACGTTCTTTTGCAGACAT</i>                                              |
| ZIKV (-) vRNA-PCR probe          | <i>5’-/56-<br/>FAM/TTGAGTGTC/ZEN/TGATTGCTTGCAAGGTA<br/>GGCT/3IABkFQ/-3’</i>  |
| Human <i>ACTB</i> -RT            | <i>CCTGGATAGCAACGTACATGG</i>                                                 |
| Human <i>ACTB</i> -PCR forward   | <i>CCTTGACATGCCGGAG</i>                                                      |
| Human <i>ACTB</i> -PCR reverse   | <i>ACAGAGCCTCGCCTTTG</i>                                                     |
| Human <i>ACTB</i> -PCR probe     | <i>5’-<br/>/5HEX/TCATCCATG/ZEN/GTGAGCTGGCGG/3IABk<br/>FQ/-3’</i>             |
| Human <i>ACTB</i> -PCR forward   | <i>ACCTTCTACAATGAGCTGCG</i>                                                  |
| Human <i>ACTB</i> -PCR reverse   | <i>CCTGGATAGCAACGTACATGG</i>                                                 |
| Human <i>NDUFA4</i> -PCR forward | <i>CATCGGTCAGGCCAAGAA</i>                                                    |
| Human <i>NDUFA4</i> -PCR reverse | <i>GGGCTCTGGGTATTTCTGTC</i>                                                  |
| Human <i>ISG15</i> forward       | <i>CGCAGATCACCCAGAAGATCG</i>                                                 |
| Human <i>ISG15</i> reverse       | <i>TTCGTGCGATTTGTCCACCA</i>                                                  |
| Human <i>IRF7</i> forward        | <i>CCCACGCTATACCATCTACCT</i>                                                 |
| Human <i>IRF7</i> reverse        | <i>GATGTCGTCATAGAGGCTGTTG</i>                                                |

**Table S2. Antibodies used for immunocytochemistry, intracellular flow cytometry analysis and western blotting analysis, Related to STAR Methods.**

| Usage               | Antibody                                                 | Clone #     | Host   | Catalog #        | Vendor            | Dilution |
|---------------------|----------------------------------------------------------|-------------|--------|------------------|-------------------|----------|
| Immunocytochemistry | Anti-Flavivirus group antigen                            | D1-4G2-4-15 | Mouse  | GTX57154         | GeneTex           | 1:100    |
| Immunocytochemistry | Anti-Flavivirus group antigen                            | D1-4G2-4-15 | Mouse  | MAB10216-I-100UG | Millipore         | 1:1000   |
| Western blot        | Anti-NDUFA4                                              | Polyclonal  | Rabbit | ab129752         | Abcam             | 1:200    |
| Immunocytochemistry | Anti-SOX2                                                | D6D9        | Rabbit | 3579             | Cell Signaling    | 1:400    |
| Immunocytochemistry | Keratin7 Rabbit mAb                                      | D1E4        | Rabbit | 4465             | Cell Signaling    | 1:200    |
| Immunocytochemistry | Alexa Fluor 594 anti-Mouse IgG (H+L) Secondary Antibody  | Polyclonal  | Donkey | A-21203          | Thermo Scientific | 1:500    |
| Immunocytochemistry | Alexa Fluor 488 anti-Rabbit IgG (H+L) Secondary Antibody | Polyclonal  | Donkey | A-21206          | Thermo Scientific | 1:500    |
| Western blot        | Anti- $\beta$ actin                                      | 15G5A11/E2  | Mouse  | MA1-140          | Thermo Scientific | 1:5000   |
| Western blot        | 680RD Donkey anti-Mouse IgG Secondary Antibody           | Polyclonal  | Donkey | 926-68072        | Li-Cor            | 1:15000  |
| Western blot        | 800CW Donkey anti-Rabbit IgG                             | Polyclonal  | Donkey | 926-32213        | Li-Cor            | 1:15000  |

|  |                       |  |  |  |  |  |
|--|-----------------------|--|--|--|--|--|
|  | Secondary<br>Antibody |  |  |  |  |  |
|--|-----------------------|--|--|--|--|--|
